# Supplementary material for: A piezo-phototronic enhanced serrate-structured ZnO-based heterojunction photodetector for optical communication
Source: Royal Society of Chemistry journal article supplement (doi:10.1039/c8nr09418g), 2019-01-01
Supplement: c8nr09418g1.pdf [file c8nr09418g1.pdf]

## Supporting information

# Piezo-phototronic Enhanced Serrate-structured ZnO-based Heterojunction Photodetector for Optical Communication

*Da Xiong,<sup>a</sup> Weili Deng,<sup>\*a</sup> Guo Tian,<sup>a</sup> Yuyu Gao,<sup>a</sup> Xiang Chu,<sup>a</sup> Cheng Yan,<sup>a</sup> Long Jin,<sup>a</sup>*

*Yuhan Su,<sup>a</sup> Wei Yan,<sup>b</sup> and Weiqing Yang,<sup>\*a,c</sup>*

<sup>a</sup> Key Laboratory of Advanced Technologies of Materials (Ministry of Education), School of Materials Science and Engineering, Southwest Jiaotong University, Chengdu 610031, China

<sup>b</sup> State Key Laboratory of Optical Technologies for Microfabrication, Institute of Optics and Electronics, Chinese Academy of Sciences, Chengdu 610209, China

<sup>c</sup> State Key Laboratory of Traction Power, Southwest Jiaotong University, Chengdu 610031, China

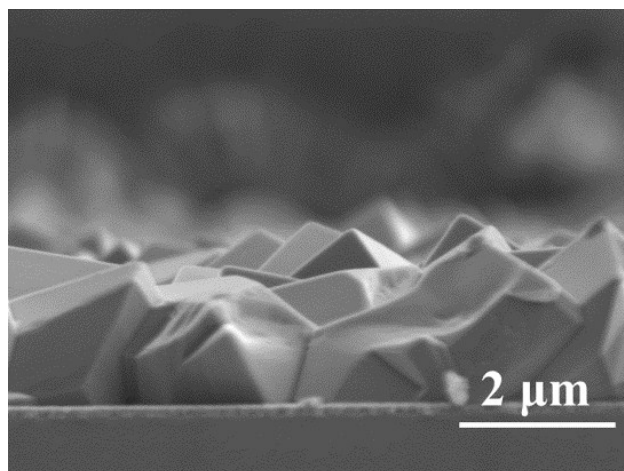

**Fig. S1.** The cross-sectional SEM image of the  $\text{Cu}_2\text{O}$  with the electrochemical deposition time of 1.0 h.

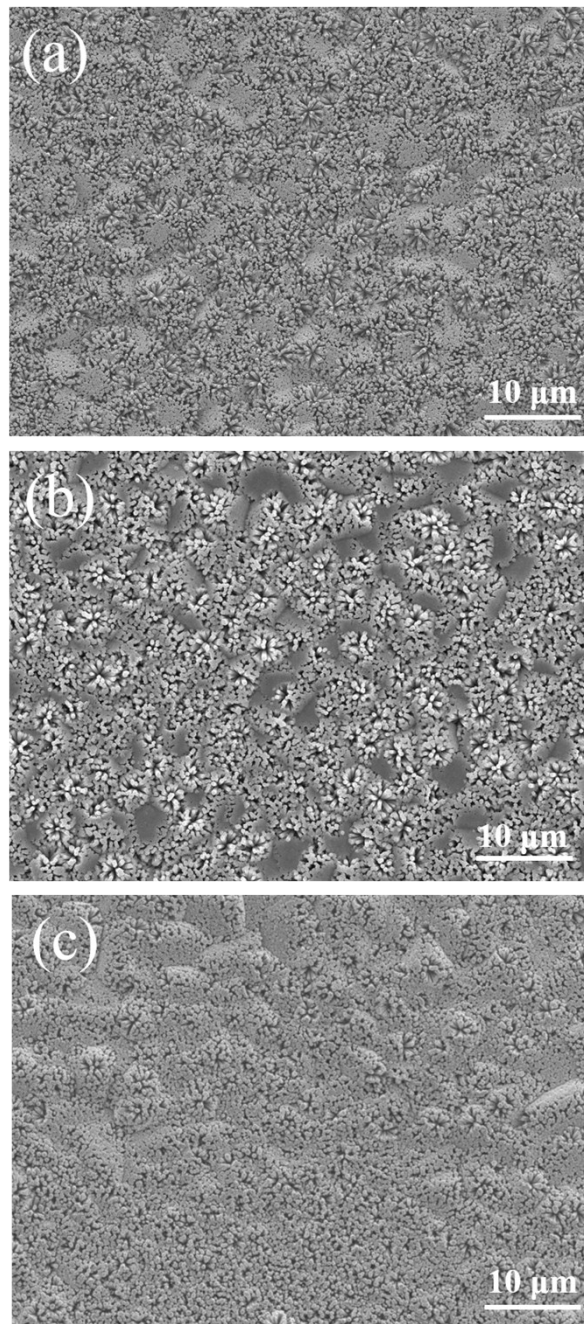

**Fig. S2.** The SEM images of ZnO nanorods synthesized on the surface of  $\text{Cu}_2\text{O}$  (a). 0.5 h, (b). 1.0 h, (c). 1.5 h

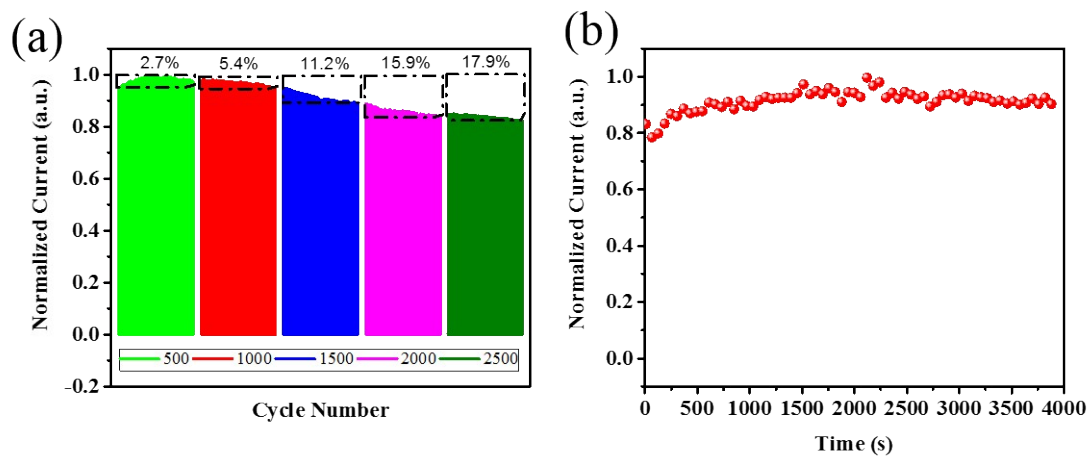

**Fig. S3.** (a) Photoresponse behaviors of the photodetector under a repetitive irradiation of more than 2500 cycles. (b) Photoresponse behaviors of the photodetector under long term radiation.

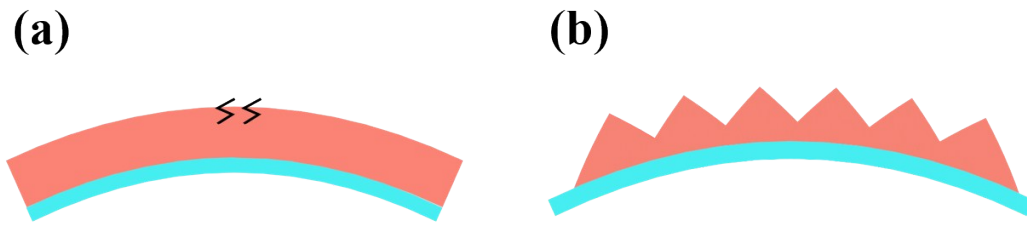

**Fig. S4.** The schematic diagram that serrate-structured design helps to improve stability

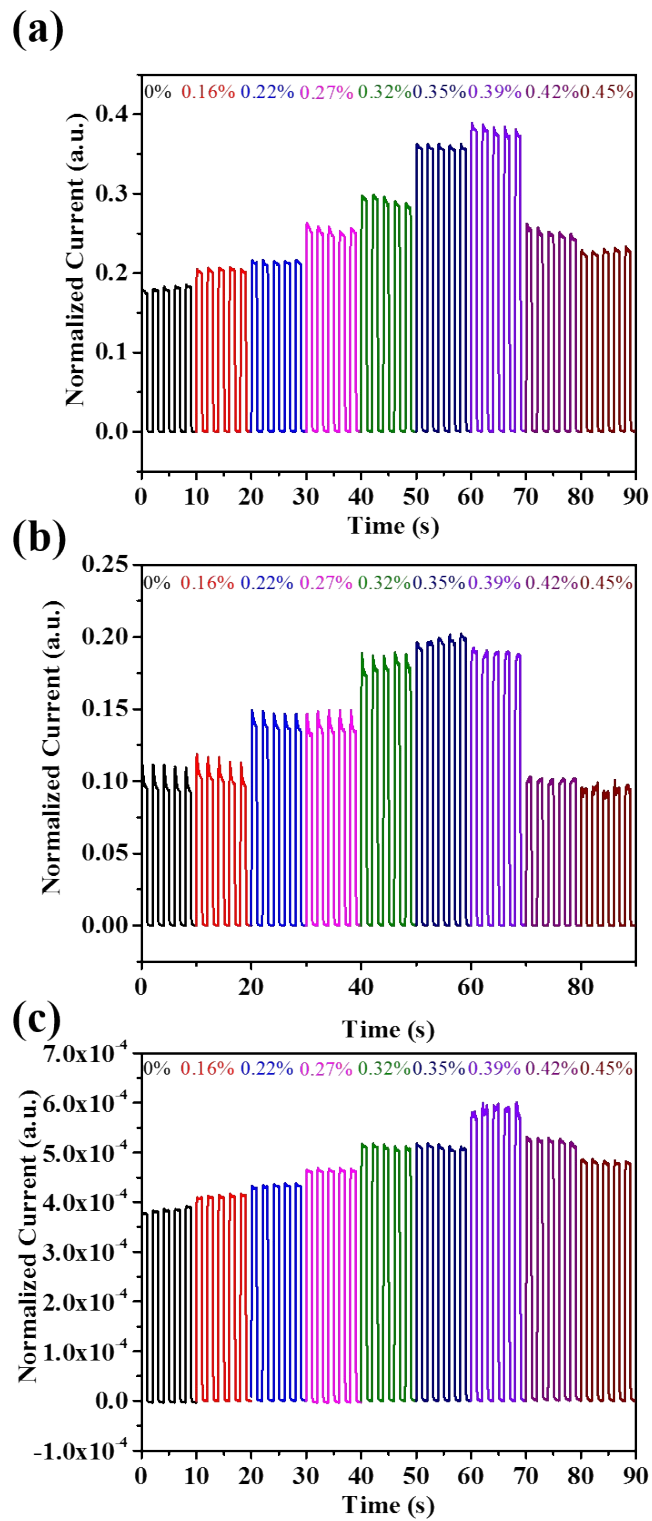

**Fig. S5.** The photoresponse behaviors of the photodetector with different strain **(a)**. 450 nm, 1.77 mW/mm<sup>2</sup> **(b)**. 532 nm, 1.77 mW/mm<sup>2</sup> **(c)**. 650 nm, 1.77 mW/mm<sup>2</sup>

**Table S1.** The performance of ZnO-based photodetectors

| Materials                          | Bias | Detection range | Dark current             | Photocurrent               | Rise time | Fall time | Reference |
|------------------------------------|------|-----------------|--------------------------|----------------------------|-----------|-----------|-----------|
| ZnO/Si                             | -2 V | 442 nm          | 3.17 $\mu$ A             | 131 $\mu$ A                | 0.97 ms   | 1.30 ms   | 1         |
| ZnO/Ga <sub>2</sub> O <sub>3</sub> | 0 V  | 261 nm          | <1 nA                    | 40 nA                      | <0.3 s    | <0.3 s    | 2         |
| ZnO/PEDO<br>T                      | 0 V  | 442 nm          | -                        | 65 nA                      | 344.4 ms  | 320.5 ms  | 3         |
| ZnO/PbS                            | 10 V | 350 nm          | 1 pA                     | 550 pA                     | <0.5 s    | <0.5 s    | 4         |
| ZnO/Spiro-<br>MeOTAD               | 0 V  | 365 nm          | 5 nA<br>/cm <sup>2</sup> | 110 nA<br>/cm <sup>2</sup> | 0.16 s    | 0.20 s    | 5         |
| ZnO/Cu <sub>2</sub> O              | 0 V  | 405 nm          | <20 nA                   | 24.90 $\mu$ A              | 1.6 ms    | 1.8 ms    | This work |

**Table S2** Performance comparison between the SZCPs and 2D materials-based photodetectors

| Materials             | Bias  | Detection range | Photocurrent  | ON/OFF ratio | Rise time | Fall time | Reference |
|-----------------------|-------|-----------------|---------------|--------------|-----------|-----------|-----------|
| ZnO/Cu <sub>2</sub> O | 0 V   | 405 nm          | 24.90 $\mu$ A | >1000        | 1.6 ms    | 1.8 ms    | This work |
| Black-phosphorus      | 0.2 V | 640 nm          | 2 nA          | >1000        | 1 ms      | 4 ms      | 6         |
| SnS <sub>2</sub>      | 5 V   | 405 nm          | <100 pA       | 3.63         | 0.4 s     | 0.6 s     | 7         |
| MoS <sub>2</sub>      | 20 V  | 514 nm          | 0.1 nA        | 500          | 13 s      | 30 s      | 8         |
| MoO <sub>3</sub>      | -     | 365 nm          | 25 $\mu$ A    | 2000         | 40 ms     | -         | 9         |

**Reference:**

- 1 H. Zou, X. Li, W. Peng, W. Wu, R. Yu, C. Wu, W. Ding, F. Hu, R. Liu, Y. Zi and Z. L. Wang, *Adv. Mater.*, 2017, **29**, 1701412.
- 2 M. Chen, B. Zhao, G. Hu, X. Fang, H. Wang, L. Wang, J. Luo, X. Han, X. Wang, C. Pan and Z. L. Wang, *Adv. Funct. Mater.*, 2018, **28**, 1706379.
- 3 W. Peng, X. Wang, R. Yu, Y. Dai, H. Zou, A. C. Wang, Y. He and Z. L. Wang, *Adv. Mater.*, 2017, **29**, 1606698.
- 4 Z. Zheng, L. Gan, J. Zhang, F. Zhuge and T. Zhai, *Adv. Sci.*, 2017, **4**, 1600316.
- 5 Y. Shen, X. Yan, H. Si, P. Lin, Y. Liu, Y. Sun and Y. Zhang, *ACS Appl. Mater. Interfaces*, 2016, **8**, 6137-6143.
- 6 M. Buscema, D. J. Groenendijk, S. I. Blanter, G. A. Steele, H. S. van der Zant and A. Castellanos-Gomez, *Nano Lett*, 2014, **14**, 3347-3352.
- 7 Y. Tao, X. Wu, W. Wang and J. Wang, *J. Mater. Chem. C*, 2015, **3**, 1347-1353.
- 8 Y. R. Lim, W. Song, J. K. Han, Y. B. Lee, S. J. Kim, S. Myung, S. S. Lee, K. S. An, C. J.



Choi and J. Lim, *Adv. Mater.*, 2016, **28**, 5025-5030.

9 J. Liu, M. Zhong, J. Li, A. Pan and X. Zhu, *Mater. Lett.*, 2015, **148**, 184-187.
